# Supplementary material for: Nonidentifiability of the Source of Intrinsic Noise in Gene Expression from Single-Burst Data
Source: PLoS Comput Biol. 2008 Oct 10;4(10):e1000192. doi: 10.1371/journal.pcbi.1000192 (PMC2538572; doi:10.1371/journal.pcbi.1000192)
Supplement: Text S1 — Derivation of probabilities. (0.10 MB PDF) [file pcbi.1000192.s001.pdf]

# Non-identifiability of the Source of Intrinsic Noise in Gene Expression From Single-Burst Data - Supplementary Material

Piers J. Ingram<sup>1,2,3</sup>, Michael P.H. Stumpf<sup>2,3</sup>, Jaroslav Stark<sup>1,2</sup>

15th August 2008

## Derivation of Probabilities

Consider a step in a Markov chain, as in Figure S1. We suppose that at time  $t_0$  the system is in state 0 from which it can make two possible transitions, to either state 1 or state 2, with rates  $\alpha$  and  $\beta$  respectively. The probability that it is still in state 0 at some time  $t > t_0$  is  $e^{-(\alpha+\beta)(t-t_0)}$  and therefore the system is certain to eventually move to either state 1 or state 2. We wish to compute the probabilities of these two possibilities, irrespective of when they happen. The probability that the transition occurs between  $t$  and  $t+\delta t$  is  $(\alpha+\beta)\delta t e^{-(\alpha+\beta)(t-t_0)}$ . The probability that the transition during this time is to state 1 is  $\alpha\delta t e^{-(\alpha+\beta)(t-t_0)}$  and the probability that it is to state 2 is  $\beta\delta t e^{-(\alpha+\beta)(t-t_0)}$ . Hence the probability that the next state is 1 is

$$p = \frac{\alpha\delta t e^{-(\alpha+\beta)(t-t_0)}}{(\alpha+\beta)\delta t e^{-(\alpha+\beta)(t-t_0)}} = \frac{\alpha}{\alpha+\beta},$$

and the probability that the next state is 2 is

$$1 - p = \frac{\beta}{\alpha+\beta}.$$

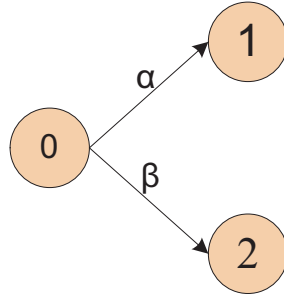

Figure S1: If the system is in state 0 at a given time, it can transit to state 1 at a rate  $\alpha$  or to state 2 at a rate  $\beta$ . The probability that the system will transit from state 0 to step 1 in an arbitrary time-step  $h$  is  $\alpha h$ .

---

<sup>1</sup>Department of Mathematics, Imperial College London, London, SW7 2AZ, UK.

<sup>2</sup>Centre for Integrative Systems Biology at Imperial College (CISBIC), Imperial College London, London, SW7 2AZ, UK.

<sup>3</sup>Theoretical Genomics Group, Centre for Bioinformatics, Division of Molecular Biosciences, Imperial College London, London, SW7 2AZ, UK.

**The Joint Distribution** In the main paper we have given the overall protein burst size distribution  $P(n)$ . It is also possible to derive the more detailed joint distribution  $P(m, n)$  that exactly  $m$  mRNA and  $n$  protein molecules are produced. We may think of this as

$$P(m, n) = P(n|M = m)R(m),$$

where  $P(n|M = m)$  is the conditional distribution that  $n$  proteins are produced if there are  $m$  mRNA molecules. If we assume that each transcript produces copies of the protein independently then the generating function  $P^*(z|m)$  is just the product of the  $m$  generating functions for the protein produced by one mRNA molecule,

$$P^*(z|m) = [Q^*(z)]^m = \left( \frac{1}{1 + A_2 - A_2 z} \right)^m.$$

Hence to compute the probabilities  $P(n|M = m)$ , we calculate

$$\begin{aligned} P(n|M = m) &= \frac{1}{n!} \frac{d^n}{dz^n} \{[Q^*(z)]^m\}_{z=0} \\ &= \frac{1}{n!} \frac{d^n}{dz^n} \left\{ \frac{1}{(1 + A_2 - zA_2)^m} \right\}_{z=0}. \end{aligned}$$

For the case  $n = 1$ , we may easily compute

$$P(1|M = m) = \frac{1}{(1 + A_2)^{m+1}}.$$

We now prove the more general result using the case  $n = 1$  as a basis for induction. Assuming that for the case  $n = i$ :

$$P(i|M = m) = \frac{(m + i - 1)!}{i!(m - 1)!} \frac{A_2^i}{(1 + A_2 - zA_2)^{m+i}},$$

then for  $n = i + 1$ :

$$\begin{aligned} \frac{d^{i+1}}{dz^{i+1}} \{[Q^*(z)]^m\} &= \frac{d}{dz} \frac{d^i}{dz^i} \{[Q^*(z)]^m\} \\ &= \frac{d}{dz} \left( \frac{(m + i - 1)!}{(m - 1)!} \frac{A_2^i}{(1 + A_2 - zA_2)^{m+i}} \right) \\ &= \frac{(m + i - 1)!(m + i)}{(m - 1)!} \frac{A_2 A_2^i}{(1 + A_2 - zA_2)^{m+i+1}} \\ &= \frac{(m + i)!}{(m - 1)!} \frac{A_2^{i+1}}{(1 + A_2 - zA_2)^{m+i+1}} \end{aligned}$$

which completes the inductive step. Therefore

$$P(n|M = m) = \frac{(m + n - 1)!}{n!(m - 1)!} \frac{A_2^n}{(1 + A_2)^{m+n}}.$$

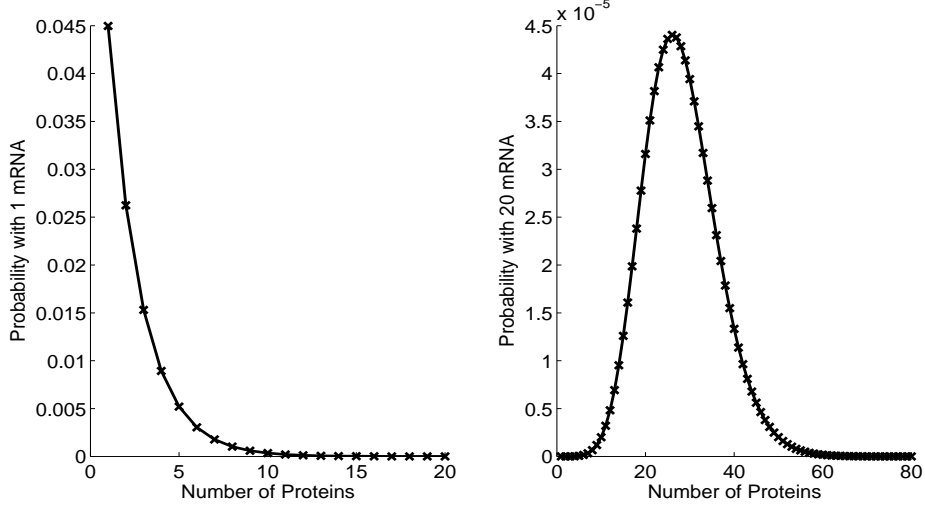

Figure S2: Distribution of the number of proteins which will be produced during a gene expression burst with one mRNA molecule and with twenty mRNA molecules.

Thus the joint probability may now be calculated as

$$\begin{aligned}
 P(n, m) &= P(n|M = m)R(m) \\
 &= \frac{(m+n-1)!}{n!(m-1)!} \frac{A_2^n}{(1+A_2)^{m+n}} \frac{A_1^m}{(1+A_1)^{m+1}}.
 \end{aligned}$$

This is illustrated for two different values of number of mRNA molecules in Figure S2.

Finally, by summing over  $m$  we can recover the overall burst size distribution  $P(n)$  which was derived using generating functions (but only the conditional distribution for  $n > 0$  was explicitly stated). Special consideration is needed for the case  $n = 0$ , as the case that no transcripts are produced must be added to the probability that  $m$  transcripts are produced but no proteins are produced. Thus

$$P(0) = \frac{A_1}{1+A_1} \frac{1}{(1+A_2+A_1A_2)} + \frac{1}{1+A_1},$$

and for  $n > 0$

$$P(n) = \sum_{m=1}^{\infty} P(n, m) = \frac{A_1}{1+A_1} \frac{(A_2+A_1A_2)^n}{(1+A_2+A_1A_2)^{n+1}}.$$

Conditioning on  $n > 0$  and defining  $A_2 = A_2(1+A_1)$  recovers  $\hat{P}(n)$  as in the main article. Similar calculations can be carried out for the various extensions to the standard model considered above, though the details become quite lengthy for the more complex cases.

### Alternative generalisation

A different generalisation is to add additional loops with the same structure as the current transcription and translation loops, Figure S3. We prove below that if we have  $k-1$  such loops,

the final conditional protein size distribution  $\hat{P}_k(n)$  will still be geometric

$$\hat{P}_k(n) = \frac{\hat{A}_k^{n-1}}{(1 + \hat{A}_k)^n}, \quad (\text{S1})$$

with the parameter  $\hat{A}_k$  given by

$$\hat{A}_k = A_k + A_k A_{k-1} + \dots + A_k A_{k-1} \dots A_1 = \sum_{i=1}^k \prod_{j=i}^k A_j. \quad (\text{S2})$$

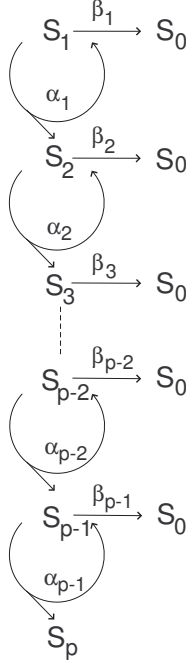

Figure S3: Diagram of the generalised situation with  $k - 1$  serially coupled loops of the type considered. If  $k = 3$  then we have a system with two loops which we have used to model transcription and translation in gene expression.

By induction, suppose that at the  $k^{\text{th}}$  stage the conditional distribution  $\hat{P}_k(n)$  is geometric and has generating function  $\hat{P}_k^*(z) = z/(1 + \hat{A}_k(1 - z))$ . If the generating function for the next loop is  $Q_{k+1}^*(z) = 1/(1 + A_{k+1}(1 - z))$  then adding this loop gives  $\hat{P}_{k+1}^*(z) = Q_{k+1}^*(\hat{P}_k^*(z)) = (1 + \hat{A}_k(1 - z))/(1 + A_{k+1}(1 + \hat{A}_k)(1 - z))$ . This has the same form as  $\hat{P}^*(z)$  given in the main text, and so carrying out the conditioning on  $n > 0$  gives  $\hat{P}_k^*(z) = z/(1 + A_{k+1}(1 + \hat{A}_k)(1 - z))$  completing the inductive step with  $\hat{A}_{k+1} = A_{k+1}(1 + \hat{A}_k)$ .

Iterating this with initial condition  $\hat{A}_1 = A_1$  gives the expression in Equation S2.
